# Supplementary material for: Aqueous systems of a surface active ionic liquid having an aromatic anion: phase behavior, exfoliation of graphene flakes and its hydrogelation
Source: Royal Society of Chemistry journal article supplement (doi:10.1039/c9cp04449c), 2019-11-18
Supplement: c9cp04449c1.pdf [file c9cp04449c1.pdf]

## **Aqueous Systems of Surface Active Ionic Liquid Having Aromatic Anion: Phase Behavior, Exfoliation of Graphene Flakes and Its Hydrogelation**

Manvir Kaur,<sup>a</sup> Gagandeep Singh,<sup>a</sup> Krishnaiah Damarla,<sup>b</sup> Gurbir Singh,<sup>a</sup> Huiyong Wang,<sup>c</sup> Jianji Wang,<sup>c</sup>  
Vinod Kumar Aswal,<sup>d</sup> Arvind Kumar,<sup>b</sup> Tejwant Singh Kang<sup>\*a</sup>

<sup>a</sup>*Department of Chemistry, UGC Sponsored Centre for Advanced Studies-II, Guru Nanak Dev University, Amritsar-143005*

<sup>b</sup>*AcSIR, CSIR-Central Salt and Marine Chemicals Research Institute, G. B. Marg, Bhavnagar 364002, India*

<sup>c</sup>*Collaborative Innovation Center for Henan Province for Green manufacturing of Fine Chemicals, Key Laboratory of Green Chemicals Media and Reactions, Ministry of Education, School of Chemistry and Chemical Engineering, Henan Normal University, Xinxiang, Henan-453007, P. R. China*

<sup>d</sup>*Solid State Physics Division, Bhabha Atomic Research Centre, Mumbai 400085, India*

### Supporting Information

*\*To whom correspondence should be addressed:*

*e-mail:* [tejwantsinghkang@gmail.com](mailto:tejwantsinghkang@gmail.com); [tejwant.chem@gndu.ac.in](mailto:tejwant.chem@gndu.ac.in); Tel: +91-183-2258802-Ext-

3291

## Annexure S1

### Synthetic procedure for the preparation of [C<sub>16</sub>mim][PTS]

Equal molar amount of [C<sub>16</sub>mim][Cl] and the sodium p-toluenesulfonate were mixed in butanol and stirred at 25 °C overnight. The reaction mixture was filtered to remove NaCl, formed during the reaction. Butanol was removed by rotary evaporation. Obtained residue was washed with diethyl ether to remove the residual butanol, if any. Obtained SAIL was dried for 24 hours under vacuum and characterized by using <sup>1</sup>H NMR.

### <sup>1</sup>H NMR Data

<sup>1</sup>H NMR (500 MHz, 10% D<sub>2</sub>O and 90% H<sub>2</sub>O, δ-ppm) 0.84 (t, 3H, -CH<sub>3</sub>), 1.09-1.25 (m, 26H, (-CH<sub>2</sub>)<sub>13</sub>), 1.49 (q, 2H, N<sup>+</sup>-CH<sub>2</sub>-CH<sub>2</sub>-), 2.19 (s, 3H, -CH<sub>3</sub>), 3.76 (s, 3H, N-CH<sub>3</sub>), 3.88 (t, 2H, N<sup>+</sup>-CH<sub>2</sub>-CH<sub>2</sub>-), 7.07 (d, 2H, benzene), 7.27 (s, 1H, N-CH-CH-N<sup>+</sup>), 7.32 (s, 1H, N-CH-CH-N<sup>+</sup>), 7.60 (d, 2H, benzene), 8.64 (s, 1H, N-CH-N<sup>+</sup>).

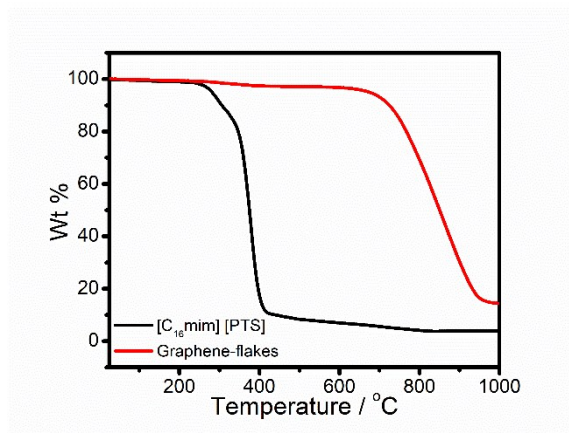

**Figure S1:** TGA of exfoliated graphene-flakes after separation from the dispersion and SAIL [C<sub>16</sub>mim][PTS]. (No peak corresponding to SAIL in the plot of graphene-flakes suggest the recovery of graphene-flakes without any contamination)

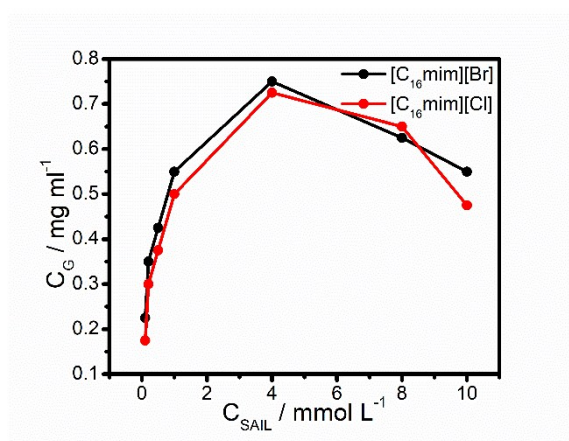

**Figure S2:** Concentration of exfoliated graphene-flakes (C<sub>G</sub>) as a function of concentration of SAIL (C<sub>SAIL</sub>).

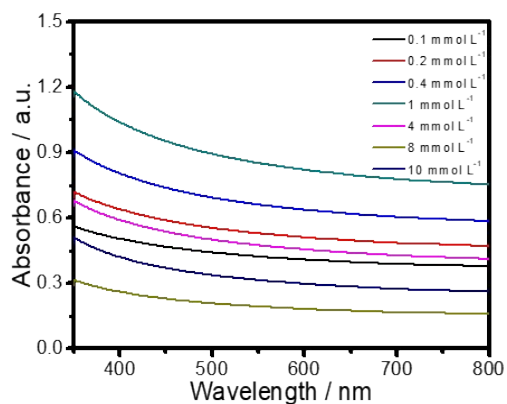

**Figure S3:** UV absorption spectra of graphene-flakes dispersion in different concentration of SAIL in aqueous medium.

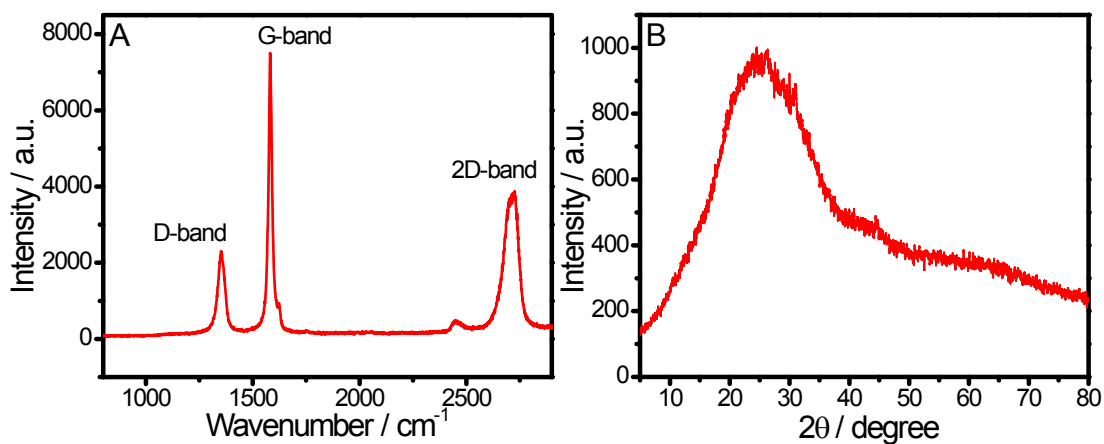

**Figure S4:** (A) Raman Spectrum ( $I_D/I_G = 0.32$ ) and (B) XRD pattern of graphene-flakes extracted from hydrogel.

**Table S1:** Various parameters obtained from SANS measurements.

| <b>Sample</b>            | <b>Semi-major axis<br/>a (nm)</b> | <b>Semi-minor axis<br/>b=c (nm)</b> | <b>Charge<br/>q (e.u.)</b> |
|--------------------------|-----------------------------------|-------------------------------------|----------------------------|
| 5 mmol L <sup>-1</sup>   | 4.5                               | 1.7                                 | -                          |
| 10 mmol L <sup>-1</sup>  | 8.9                               | 1.9                                 | -                          |
| 20 mmol L <sup>-1</sup>  | 12.1                              | 2.0                                 | -                          |
| 50 mmol L <sup>-1</sup>  | 21.2                              | 2.1                                 | 40                         |
| 100 mmol L <sup>-1</sup> | 22.8                              | 2.1                                 | 34                         |
| 150 mmol L <sup>-1</sup> | 24.2                              | 2.1                                 | 32                         |
